# Supplementary material for: Microbial Dynamics during labneh Ambaris Production in Earthenware Jars
Source: MDPI journal article supplement (doi:10.3390/foods12163131), 2023-08-21
Supplement: s1 [file s1]

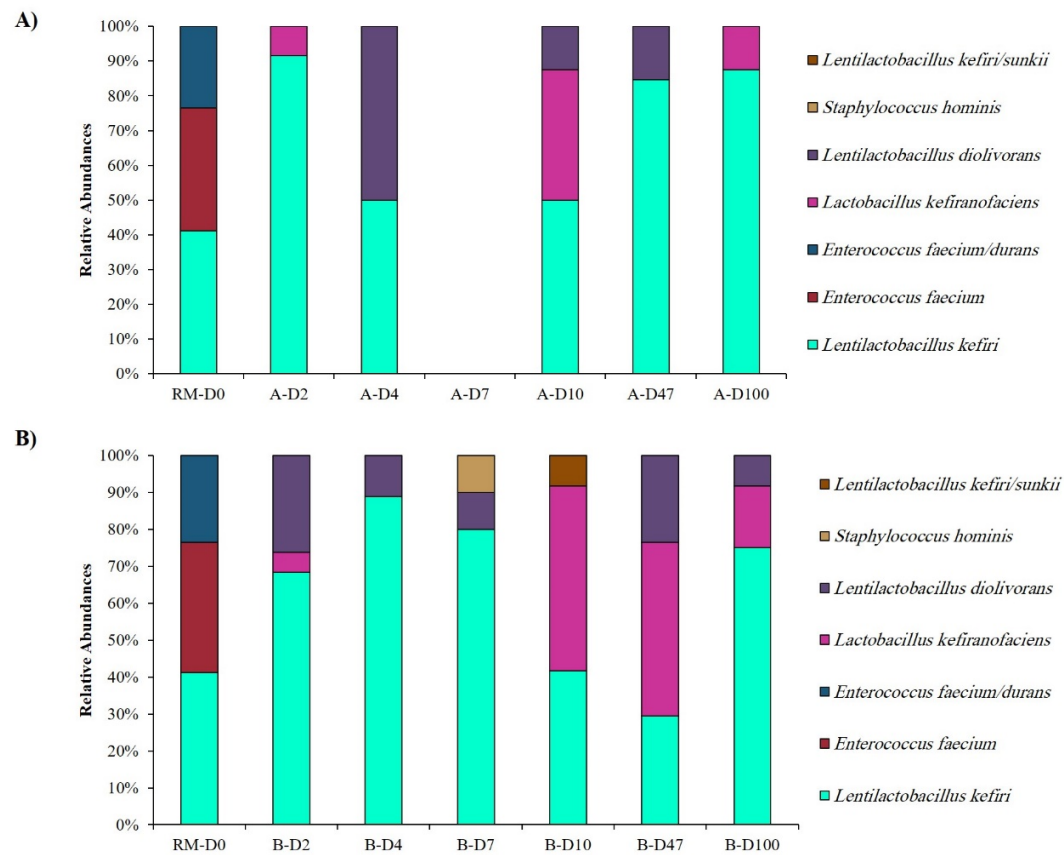

Figure S2. Bacterial community dynamics in labneh Ambaris samples collected during production from 2 earthenware jars, Jar A and Jar B, in addition to the initial raw milk by sequencing of the V1-V4 region of the 16S rRNA gene.
