# Supplementary material for: Microbial Dynamics during labneh Ambaris Production in Earthenware Jars
Source: MDPI journal article supplement (doi:10.3390/foods12163131), 2023-08-21
Supplement: s1 [file s1]

Table S1. Microbial counts obtained on 5 nutritive and selective media during production of labneh Ambaris from D0 until the final products. Two productions were monitored in two earthenware jars (Jar A and Jar B). ND means not determined. The values presented here are the 2 values (n=2) for each sample and the average value.

| Sampling day | Sample codes | Total mesophilic aerobic flora<br>Value 1 / Value 2<br>(log cfu/g or mL) | Average total mesophilic aerobic flora (log cfu/g or mL) | Total presumptive lactobacilli<br>Value 1 / Value 2<br>(log cfu/g or mL) | Average total presumptive lactobacilli (log cfu/g or mL) |
|--------------|--------------|--------------------------------------------------------------------------|----------------------------------------------------------|--------------------------------------------------------------------------|----------------------------------------------------------|
| D0           | RM-D0        | 6.30 / 6.21                                                              | 6.26                                                     | 4.46 / 4.47                                                              | 4.46                                                     |
| D2           | A-D2         | 8.78 / 8.79                                                              | 8.79                                                     | 8.11 / 8.08                                                              | 8.10                                                     |
|              | B-D2         | ND / 5.83                                                                | 5.83                                                     | 8.11 / 8.23                                                              | 8.18                                                     |
| D4           | A-D4         | 6.70 / 6.78                                                              | 6.74                                                     | ND / 6.31                                                                | 6.31                                                     |
|              | B-D4         | 7.80 / 8.23                                                              | 8.00                                                     | 8.05 / 7.74                                                              | 7.90                                                     |
| D7           | A-D7         | 6.25 / 6.34                                                              | 6.30                                                     | 8.40 / 8.41                                                              | 8.40                                                     |
|              | B-D7         | 8.00 / 7.96                                                              | 7.98                                                     | 9.11 / 8.62                                                              | 8.87                                                     |
| D10          | A-D10        | 7.91 / 8.09                                                              | 8.01                                                     | 8.18 / 8.12                                                              | 8.16                                                     |
|              | B-D10        | 8.09 / 8.12                                                              | 8.10                                                     | 8.26 / 8.31                                                              | 8.28                                                     |
| D29          | A-D29        | 8.20 / 8.25                                                              | 8.23                                                     | 7.53 / ND                                                                | 7.53                                                     |
|              | B-D29        | 7.04 / 7.13                                                              | 7.09                                                     | ND / 8.35                                                                | 8.35                                                     |
| D47          | A-D47        | 6.48 / 6.85                                                              | 6.66                                                     | 6.48 / 6.20                                                              | 6.34                                                     |
|              | B-D47        | 7.38 / ND                                                                | 7.38                                                     | 7.27 / 7.08                                                              | 7.18                                                     |
| D93          | A-D93        | 7.56 / 7.54                                                              | 7.55                                                     | 7.36 / 7.24                                                              | 7.31                                                     |
|              | B-D93        | 7.66 / 7.46                                                              | 7.57                                                     | ND / 7.58                                                                | 7.58                                                     |
| D98          | A-D98        | 7.73 / ND                                                                | 7.73                                                     | ND / ND                                                                  | ND                                                       |
|              | B-D98        | 7.96 / ND                                                                | 7.96                                                     | ND / ND                                                                  | ND                                                       |
| D103         | A-D103       | 5.34 / ND                                                                | 5.34                                                     | 4.34 / ND                                                                | 4.34                                                     |
|              | B-D103       | 5.64 / ND                                                                | 5.64                                                     | 5.11 / ND                                                                | 5.11                                                     |

| Sampling day | Sample codes | Total yeasts and molds<br>Value 1 / Value 2<br>(log cfu/g or mL) |      | Average total yeasts and molds (log cfu/g or mL) | Total <i>Enterobacteriaceae</i> family<br>Value 1 / Value 2<br>(log cfu/g or mL) | Average total <i>Enterobacteriaceae</i> family (log cfu/g or mL) | Total coliforms<br>Value 1 / Value 2<br>(log cfu/g or mL) | Average total coliforms (log cfu/g or mL) |
|--------------|--------------|------------------------------------------------------------------|------|--------------------------------------------------|----------------------------------------------------------------------------------|------------------------------------------------------------------|-----------------------------------------------------------|-------------------------------------------|
| D0           | RM-D0        | 5.13                                                             | 5.06 | 5.10                                             | 4.76 / 4.69                                                                      | 4.72                                                             | 4.78 / 4.86                                               | 4.82                                      |
| D2           | A-D2         | ND                                                               | 6.32 | 6.32                                             | 6.47 / 6.43                                                                      | 6.45                                                             | 5.58 / 5.56                                               | 6.57                                      |
|              | B-D2         | 6.43                                                             | 6.44 | 6.44                                             | 4.40 / 4.30                                                                      | 4.35                                                             | 5.48 / 5.54                                               | 4.51                                      |
| D4           | A-D4         | 6.85                                                             | 6.97 | 6.91                                             | 3.18 / 3.04                                                                      | 3.11                                                             | <10 / <10                                                 | <10                                       |
|              | B-D4         | 7.04                                                             | 7.25 | 7.16                                             | 4.54 / 4.60                                                                      | 4.57                                                             | 4.44 / 4.34                                               | 4.39                                      |
| D7           | A-D7         | 5.34                                                             | ND   | 5.34                                             | <10 / <10                                                                        | <10                                                              | <10 / <10                                                 | <10                                       |
|              | B-D7         | 8.40                                                             | 8.39 | 8.39                                             | <10 / <10                                                                        | <10                                                              | <10 / <10                                                 | <10                                       |
| D10          | A-D10        | 8.11                                                             | 8.11 | 8.11                                             | <10 / <10                                                                        | <10                                                              | <10 / <10                                                 | <10                                       |
|              | B-D10        | 8.42                                                             | 8.05 | 8.24                                             | <10 / <10                                                                        | <10                                                              | <10 / <10                                                 | <10                                       |
| D29          | A-D29        | 8.17                                                             | 8.19 | 8.18                                             | <10 / <10                                                                        | <10                                                              | <10 / <10                                                 | <10                                       |
|              | B-D29        | 6.11                                                             | 6.15 | 6.13                                             | <10 / <10                                                                        | <10                                                              | <10 / <10                                                 | <10                                       |
| D47          | A-D47        | ND                                                               | 6.37 | 6.37                                             | <10 / <10                                                                        | <10                                                              | <10 / <10                                                 | <10                                       |
|              | B-D47        | 7.75                                                             | 7.77 | 7.76                                             | <10 / <10                                                                        | <10                                                              | <10 / <10                                                 | <10                                       |
| D93          | A-D93        | 6.72                                                             | 6.30 | 6.51                                             | <10 / <10                                                                        | <10                                                              | <10 / <10                                                 | <10                                       |
|              | B-D93        | 6.40                                                             | 6.44 | 6.42                                             | <10 / <10                                                                        | <10                                                              | <10 / <10                                                 | <10                                       |
| D98          | A-D98        | 4.96                                                             | ND   | 4.96                                             | <10 / <10                                                                        | <10                                                              | <10 / <10                                                 | <10                                       |
|              | B-D98        | 3.48                                                             | ND   | 3.48                                             | <10 / <10                                                                        | <10                                                              | <10 / <10                                                 | <10                                       |
| D103         | A-D103       | 3.27                                                             | ND   | 3.27                                             | <10 / <10                                                                        | <10                                                              | <10 / <10                                                 | <10                                       |
|              | B-D103       | 2.64                                                             | ND   | 2.64                                             | <10 / <10                                                                        | <10                                                              | <10 / <10                                                 | <10                                       |
