# Supplementary material for: Microbial Dynamics during labneh Ambaris Production in Earthenware Jars
Source: MDPI journal article supplement (doi:10.3390/foods12163131), 2023-08-21

Table S2. Microbial counts obtained on lwMRS media during the production of labneh Ambaris at different time points throughout fermentation in 2 earthenware jars

|      | Microbial counts (log cfu/g or mL) |       |
|------|------------------------------------|-------|
|      | Jar A                              | Jar B |
| D0   | 6.39                               | 6.39  |
| D2   | 6.15                               | 6.5   |
| D4   | 5.95                               | 6.16  |
| D7   | 0                                  | 4.1   |
| D10  | 4.36                               | 4.44  |
| D47  | 7.36                               | 7.66  |
| D100 | 8.35                               | 8.13  |

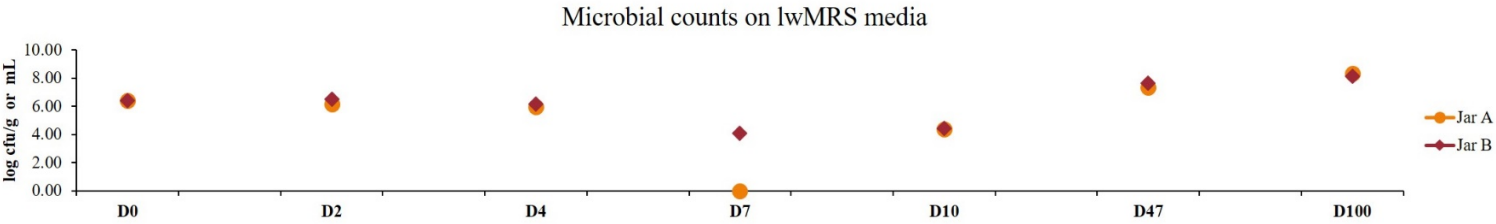

Supplement: s1 [file s1]
